# Supplementary material
Source: ML conference proceedings conference paper supplement (https://proceedings.neurips.cc/paper_files/paper/2022/hash/a935ba2236c6ba0fb620f23354e789ff-Abstract.html)
Supplement: Supplementary file 1 [file a935ba2236c6ba0fb620f23354e789ff-Supplemental-Conference.pdf]

## 1 A Qualitative comparison for ablation study

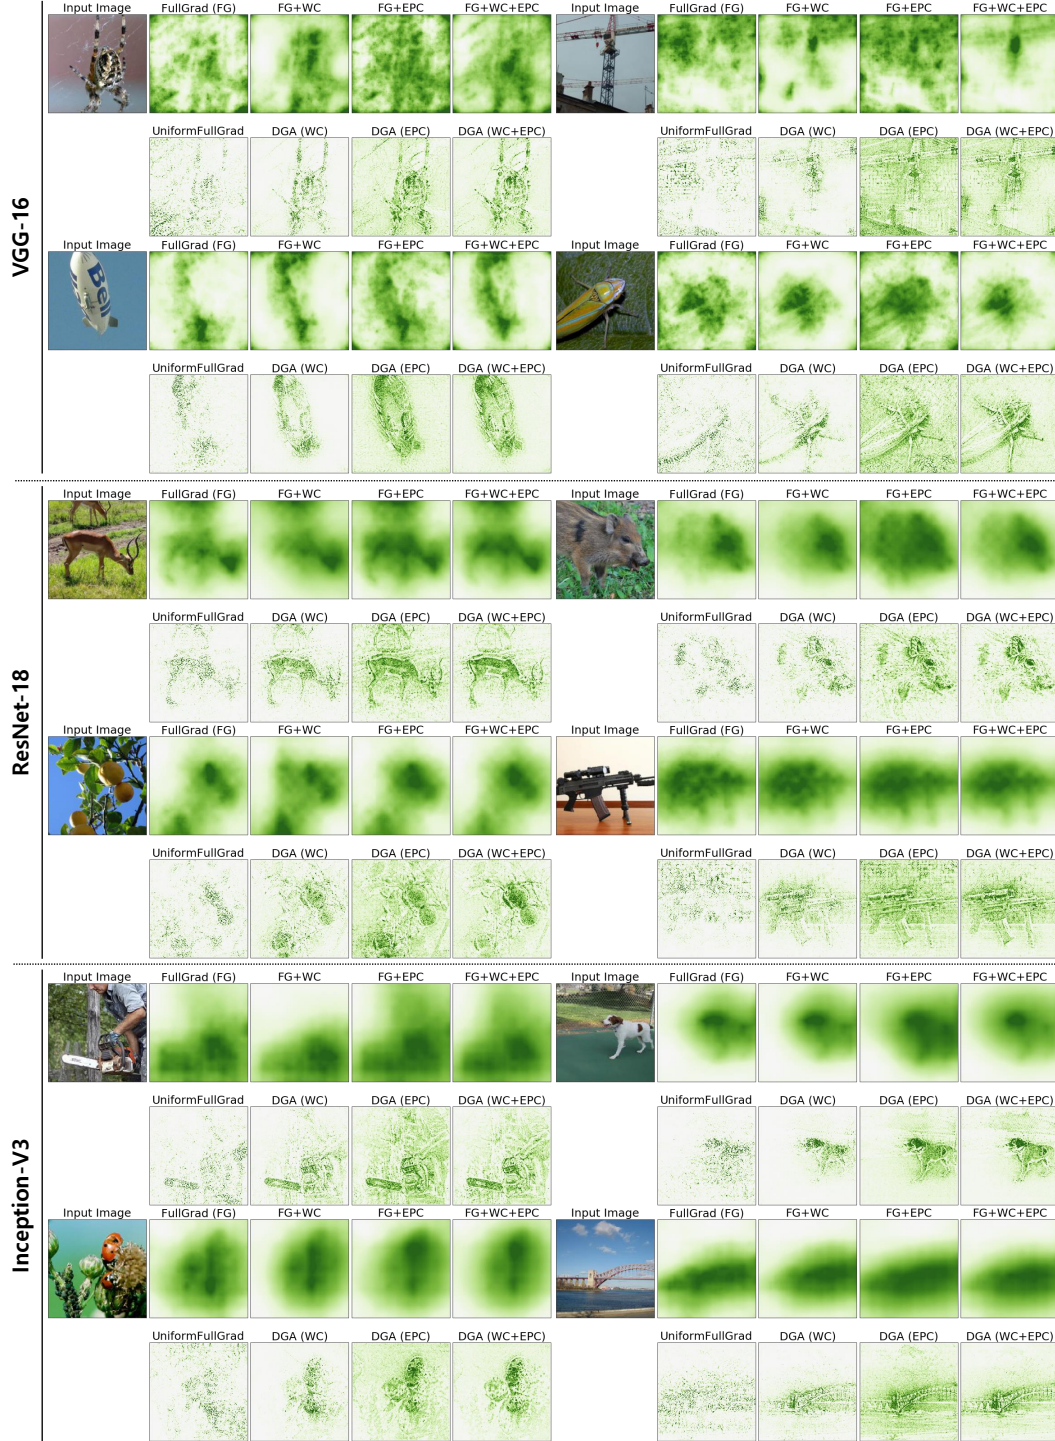

Figure 1: Qualitative comparison over the ablation of (1) FullGrad post-processing (UniformFullGrad), (2) WC mask (WC) and (3) EPC mask (EPC) on different model architectures. The results confirm that the post-processing helps to improve the resolution of the attribution. WC and EPC masks also help to concentrate on the object-aligned features.

## 2 B Comparison between various attribution methods: VGG-16

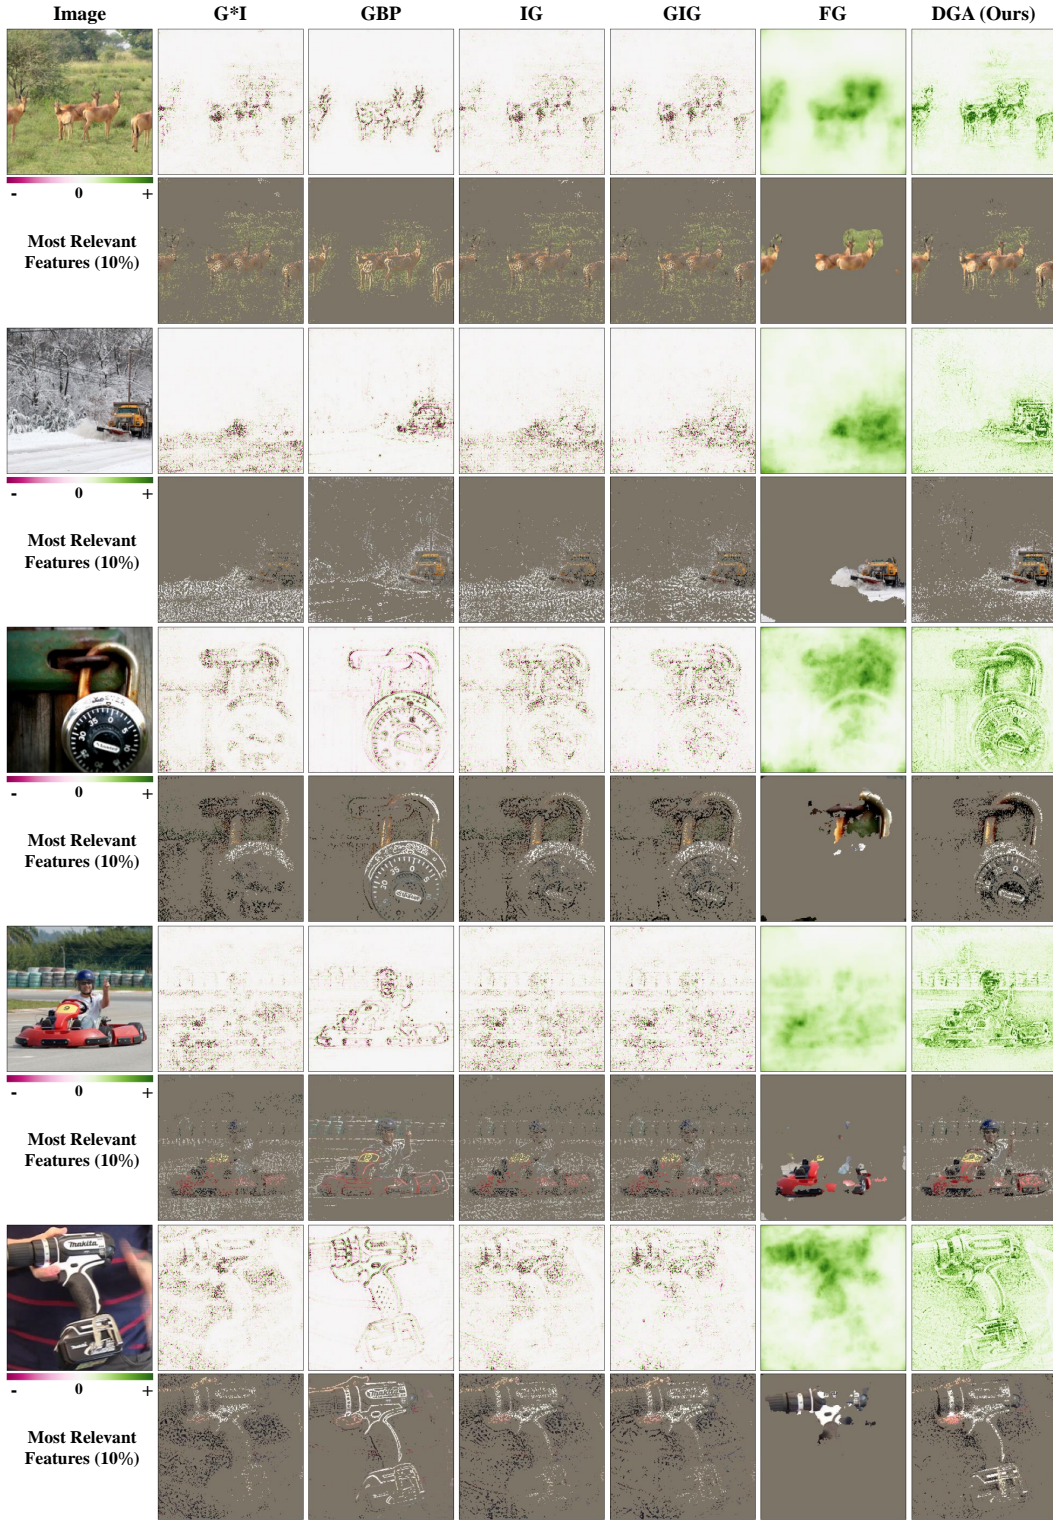

Figure 2: Qualitative comparison between various attribution methods in VGG-16. Odd rows depict the attributions and even rows depict the top pixels with top 10% attribution.

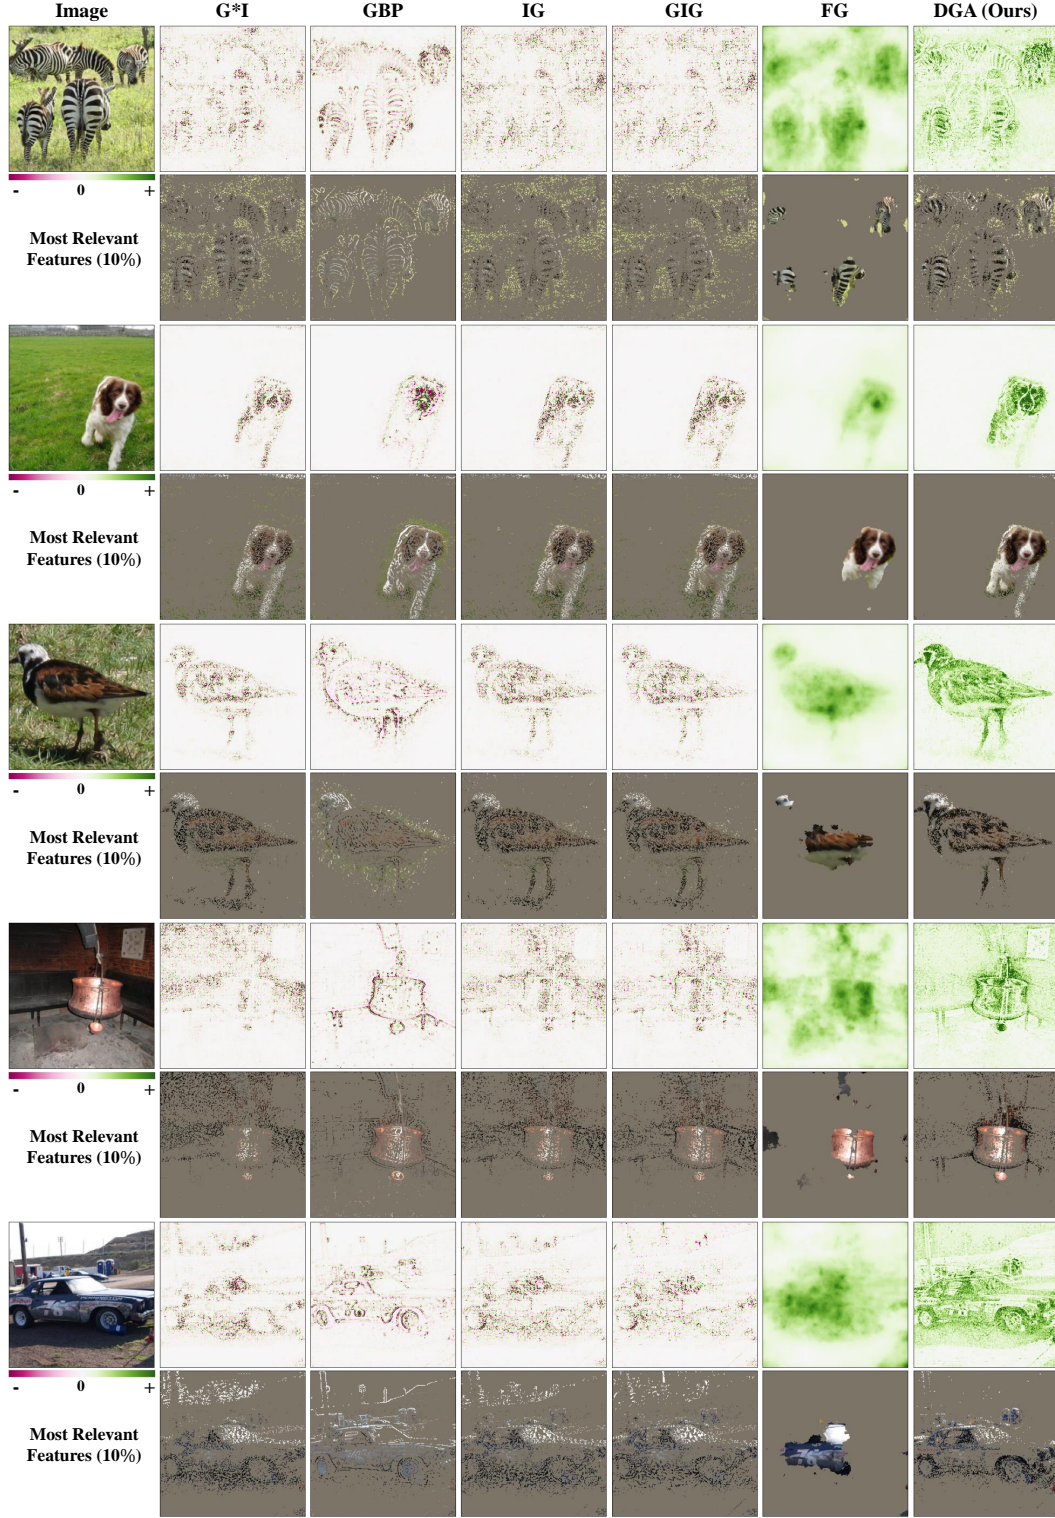

Figure 3: Qualitative comparison between various attribution methods in VGG-16. Odd rows depict the attributions and even rows depict the top pixels with top 10% attribution.

### 3 C Comparison between various attribution methods: ResNet-18

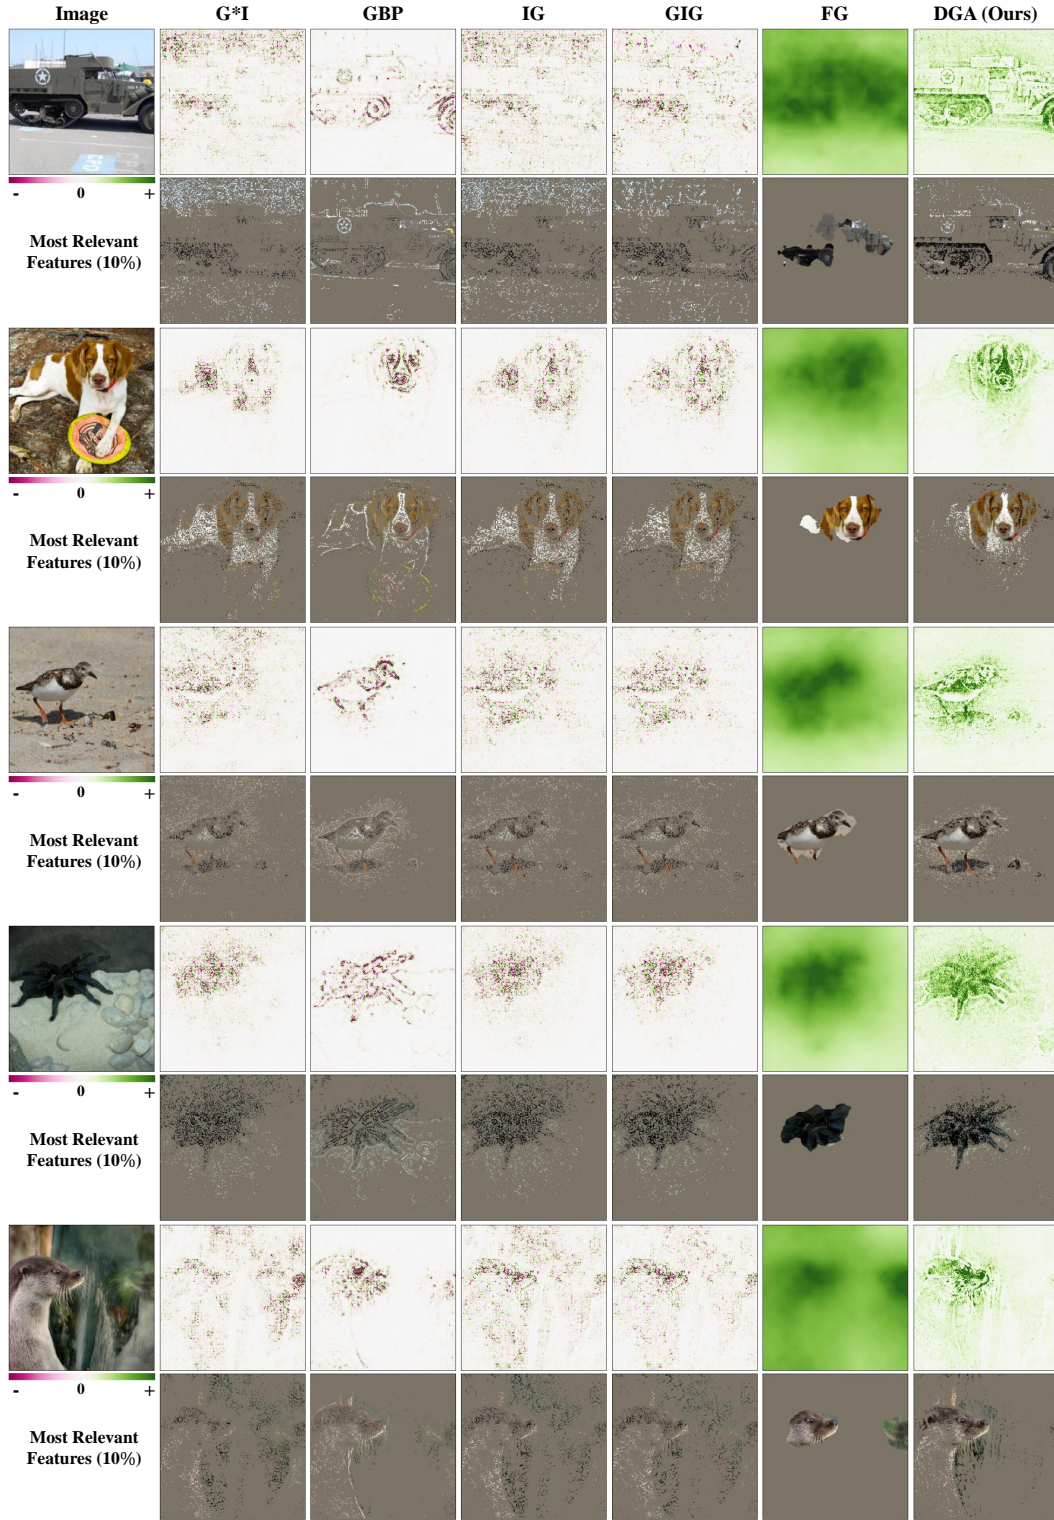

Figure 4: Qualitative comparison between various attribution methods in ResNet-18. Odd rows depict the attributions and even rows depict the top pixels with top 10% attribution.

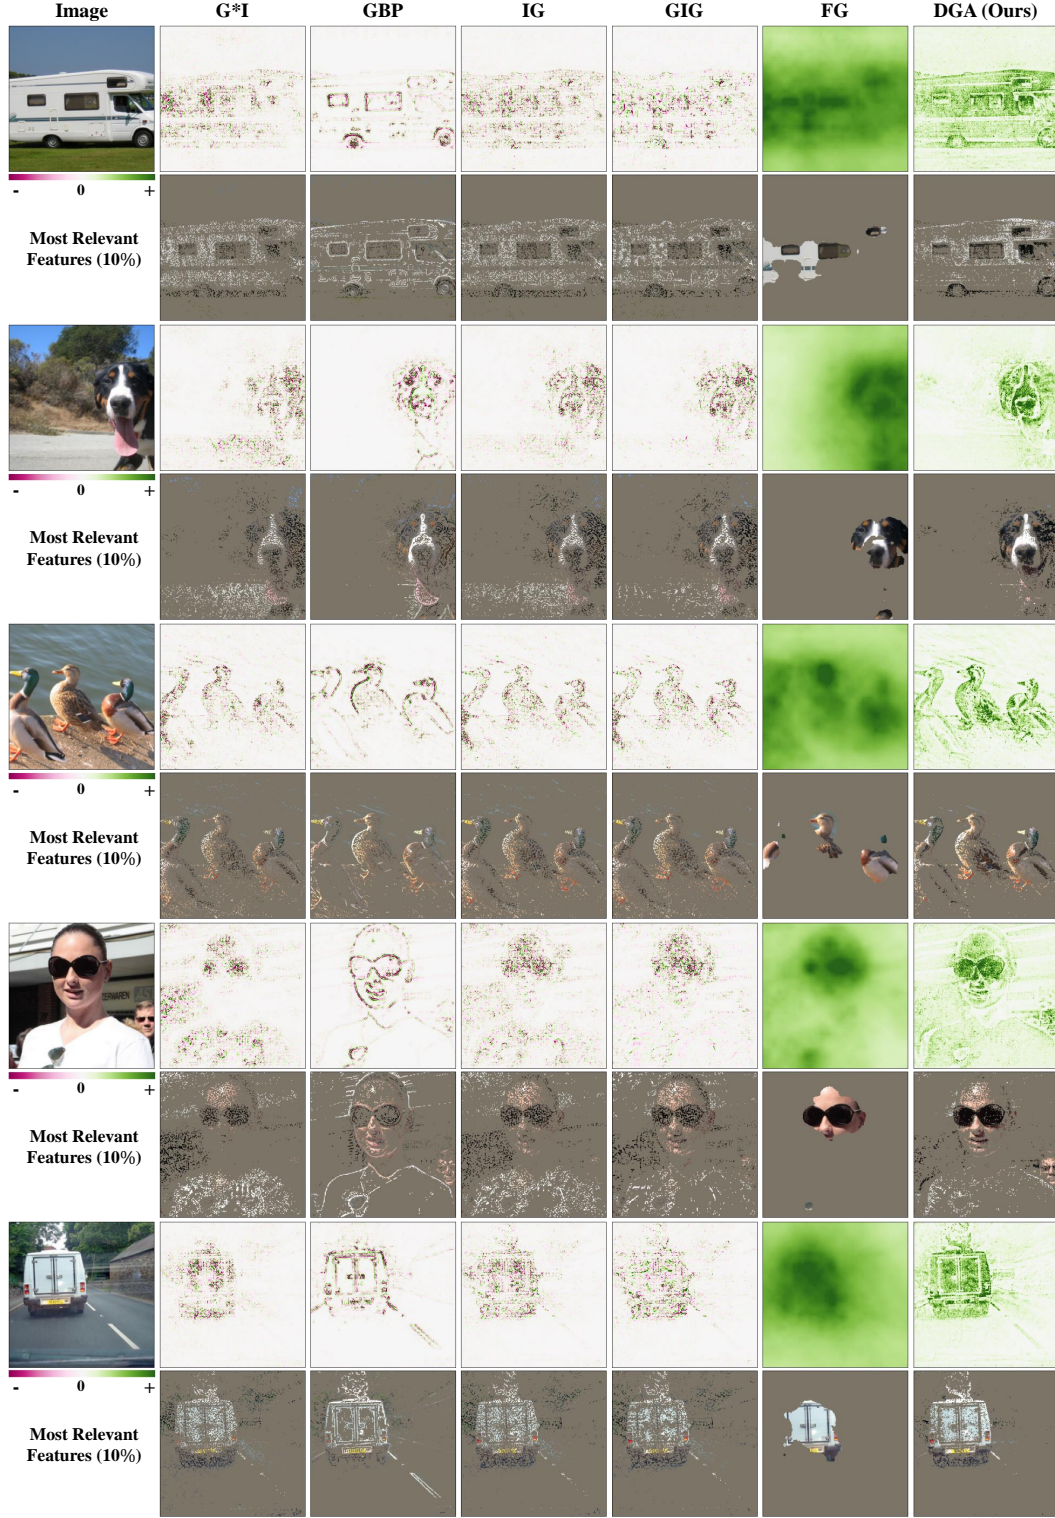

Figure 5: Qualitative comparison between various attribution methods in ResNet-18. Odd rows depict the attributions and even rows depict the top pixels with top 10% attribution.

#### 4 D Comparison between various attribution methods: Inception-v3

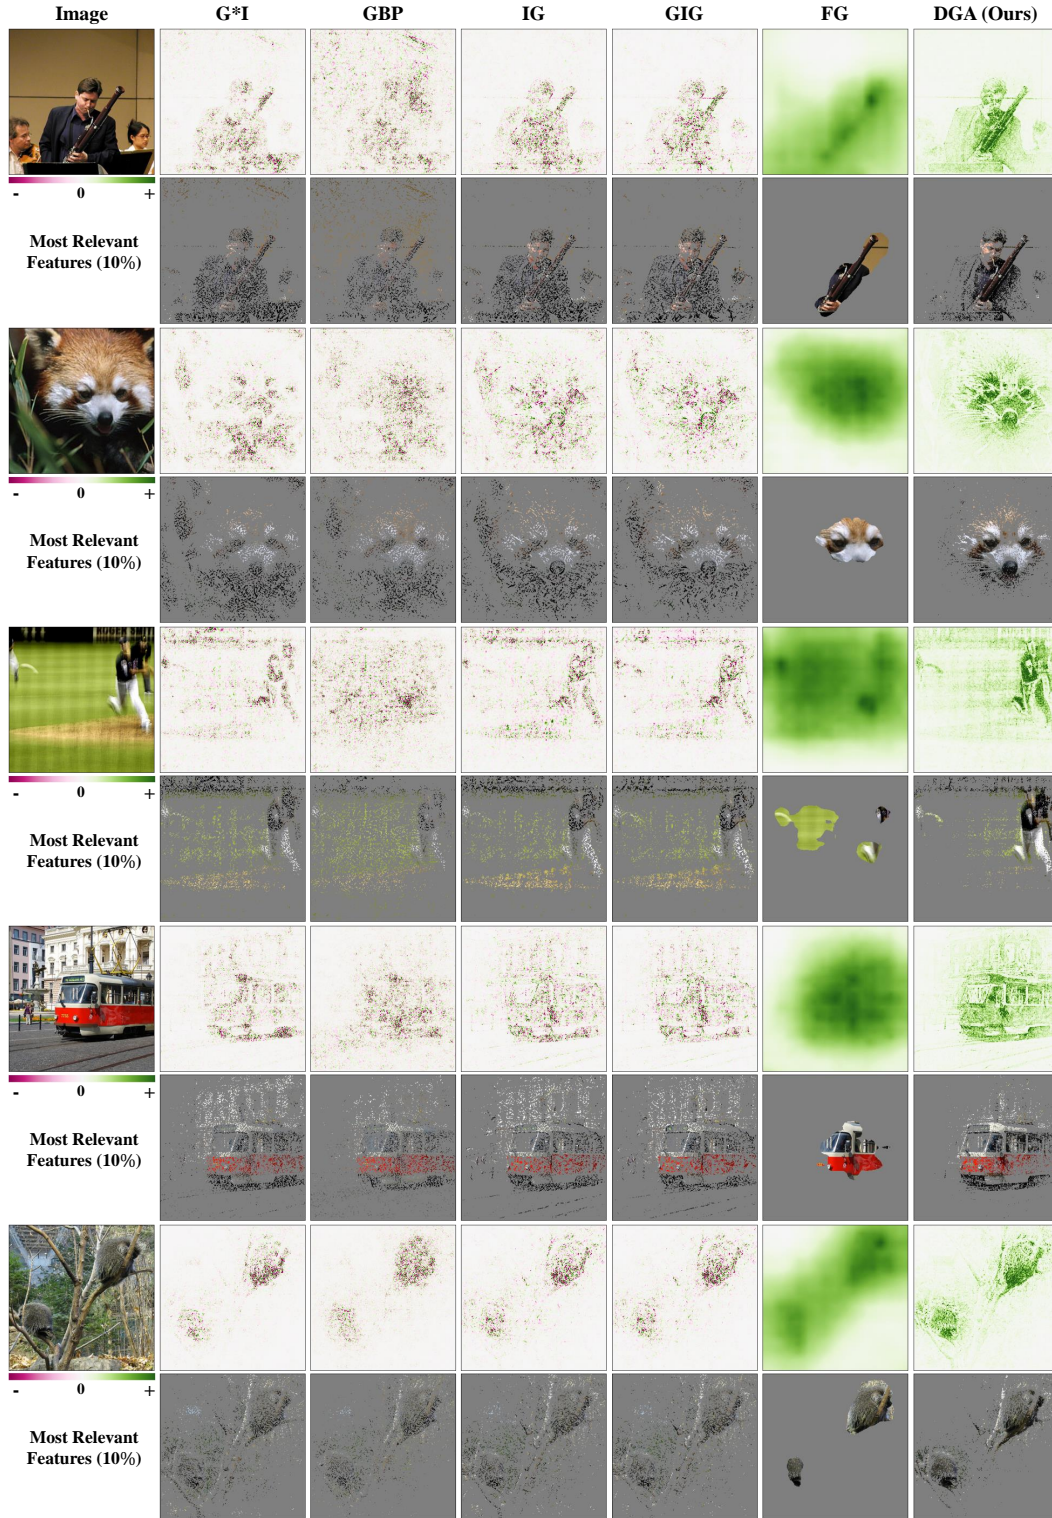

Figure 6: Qualitative comparison between various attribution methods in Inception-v3. Odd rows depict the attributions and even rows depict the top pixels with top 10% attribution.

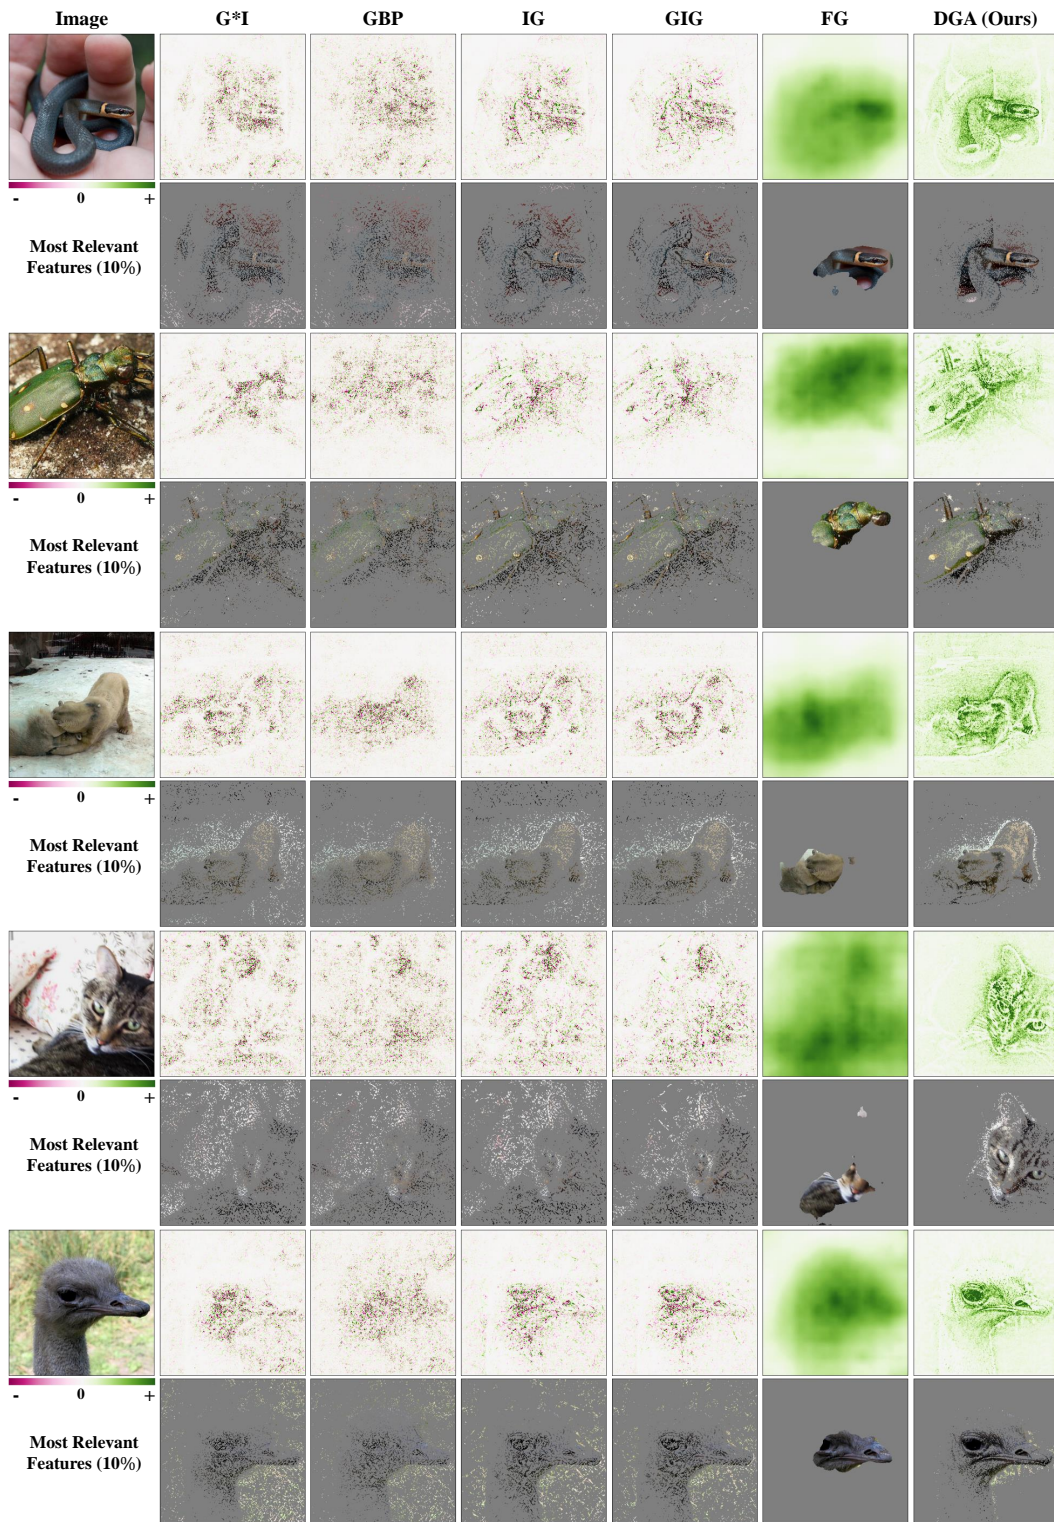

Figure 7: Qualitative comparison between various attribution methods in Inception-v3. Odd rows depict the attributions and even rows depict the top pixels with top 10% attribution.

## 5 E Comparison of the sequence generated by various methods in VGG-16

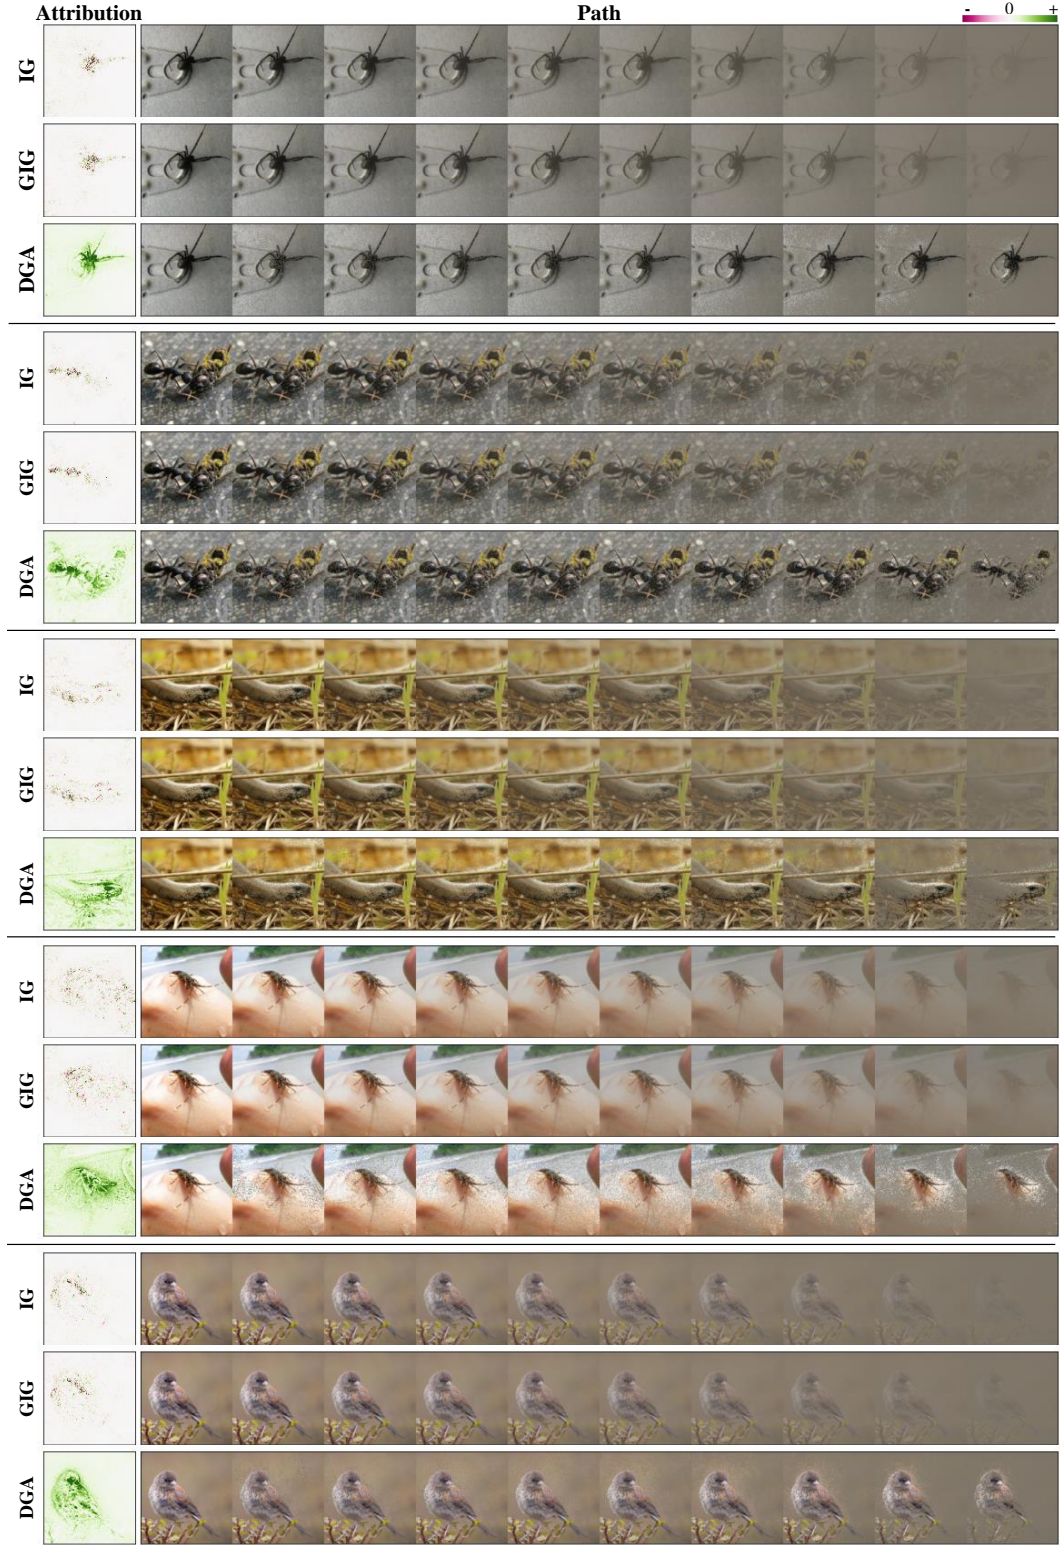

Figure 8: Comparison of utilized path for each input attribution method in VGG-16.

## 6 F Implementation Code

7 We provide the simple implementation of our algorithm in Python language.

```
import torch
def DGA(
    inputs,          # (tensor) Input tensor to be explained.
    model_func,      # (function) Model function to be explained.
    target,          # (int) Target class to be explained.
    epc_ratio=0.9,   # (float) Quantile threshold for EPC mask.
    n_steps=30,      # (int) Number of steps to aggregate attribution.
):
    attribution = 0
    cur_input = inputs.clone().requires_grad_()
    for _step in range(n_steps):
        # compute the local attribution at current input
        local_attr = local_attribution(cur_input, model_func=model_func, target=target)

        with torch.no_grad():
            # compute WC mask using low absolute quantile
            thres = local_attr.abs().flatten(1).quantile((_step+1)/n_steps, dim=-1, keepdims=True)
            thres = thres.unflatten(-1, [1,1,1])
            WC_mask = 1-(local_attr.abs() <= thres).float()

            # compute EPC mask using high positive quantile
            thres = local_attr.flatten(1).quantile(epc_ratio, dim=-1, keepdims=True)
            thres = thres.unflatten(-1, [1,1,1])
            EPC_mask = 1-(local_attr >= thres).float()

            # combine WC and EPC masks with the ratio depending on the current step
            final_mask = ((_step+1)/n_steps)*WC_mask + (1-(_step+1)/n_steps)*EPC_mask

            # take the positive attributions
            attribution += torch.relu(local_attr)

            # sample a new masked input using WC and EPC combined mask
            cur_input = torch.mul(inputs, final_mask)

    # normalize with the number of steps
    attribution = 1/n_steps * attribution
    return attribution
```

## 8 G Pixel flip evaluation with different local attribution method in DGA

9 As DGA is computed by aggregating over the local attribution over the distillation sequence, replacing  
10 different local attribution method is applicable. With changing the local attribution method, it does  
11 not only change the attribution at each step, but also change the distillation sequence. Table 1 shows  
12 the pixel flip evaluation on Grad\*Input (G\*I), DGA using G\*I, and DGA. The result indicates that the  
13 proposed DGA achieves the best performance in both LeRF and MoRF metrics. We also note that the  
14 proposed aggregation on the distillation sequence itself still induces the performance improvement,  
15 which can be verified by comparing G\*I and DGA (G\*I).

Table 1: Comparison of various attribution methods with LeRF and MoRF on three models.

|              | LeRF ( $\uparrow$ is better) |           |              | MoRF ( $\downarrow$ is better) |           |              |
|--------------|------------------------------|-----------|--------------|--------------------------------|-----------|--------------|
|              | G*I                          | DGA (G*I) | DGA          | G*I                            | DGA (G*I) | DGA          |
| VGG-16       | 0.078                        | 0.420     | <b>0.434</b> | 0.045                          | 0.028     | <b>0.023</b> |
| ResNet-18    | 0.171                        | 0.506     | <b>0.533</b> | 0.105                          | 0.028     | <b>0.019</b> |
| Inception-V3 | 0.114                        | 0.670     | <b>0.691</b> | 0.050                          | 0.066     | <b>0.041</b> |

## 16 H Ablation study using pixel flip evaluation

17 We provide the ablation study on (1) the usage of ReLU and (2) WC/EPC masks in this section. To  
 18 analyze the influence of ReLU, we compare IG and GIG with ReLU applied. We provide two variants  
 19 of applying ReLU,

$$\text{IG}_{p1} = \text{ReLU} \left( \int_{\alpha=0}^1 \frac{dF(\gamma(\alpha))}{d\gamma_i(\alpha)} \frac{d\gamma_i(\alpha)}{d\alpha} d\alpha \right), \quad (1)$$

$$\text{IG}_{p2} = \int_{\alpha=0}^1 \text{ReLU} \left( \frac{dF(\gamma(\alpha))}{d\gamma_i(\alpha)} \frac{d\gamma_i(\alpha)}{d\alpha} \right) d\alpha. \quad (2)$$

20 Variants of GIG,  $\text{GIG}_{p1}$  and  $\text{GIG}_{p2}$ , are also given as the same. Table 2 indicates that DGA shows  
 21 better performance than such ReLU variants. Such result supports that the combination of distillation  
 22 and ReLU achieves high performance, rather than ReLU itself.

23 We also provide the experiments on variants of DGA, with WC only ( $\text{DGA}_W$ ), EPC only ( $\text{DGA}_E$ ) and  
 24 both (DGA). The result indicates that using WC show better performance in LeRF, but EPC better  
 25 performs in MoRF. To achieve better performance in both metrics, we suggest to use both masks.

Table 2: Comparison of various attribution methods with LeRF and MoRF on three models.

|                                   |              | $\text{IG}_{p1}$ | $\text{IG}_{p2}$ | $\text{GIG}_{p1}$ | $\text{GIG}_{p2}$ | $\text{DGA}_W$ | $\text{DGA}_E$ | DGA          |
|-----------------------------------|--------------|------------------|------------------|-------------------|-------------------|----------------|----------------|--------------|
| LeRF<br>( $\uparrow$ is better)   | VGG-16       | 0.141            | 0.262            | 0.157             | 0.325             | 0.417          | 0.349          | <b>0.434</b> |
|                                   | ResNet-18    | 0.204            | 0.339            | 0.239             | 0.401             | <b>0.551</b>   | 0.479          | 0.533        |
|                                   | Inception-V3 | 0.233            | 0.587            | 0.239             | 0.610             | <b>0.719</b>   | 0.646          | 0.691        |
| MoRF<br>( $\downarrow$ is better) | VGG-16       | 0.036            | 0.035            | 0.030             | 0.036             | 0.039          | <b>0.018</b>   | 0.023        |
|                                   | ResNet-18    | 0.041            | 0.039            | 0.032             | 0.036             | 0.034          | <b>0.014</b>   | 0.019        |
|                                   | Inception-V3 | 0.125            | 0.070            | 0.120             | 0.069             | 0.082          | <b>0.029</b>   | 0.041        |

## 26 I Additional pixel flip evaluations with different methods

27 We provide the quantitative evaluation on different attribution methods. In experiments, 5 additional  
 28 methods are considered: DeepLIFT (DLIFT) [Shrikumar *et al.*, 2017], LRP [Bach *et al.*, 2015],  
 29 SmoothGrad (SG) [Smilkov *et al.*, 2017], RISE [Petsiuk *et al.*, 2018] and Grad-CAM (GCAM)  
 [Selvaraju *et al.*, 2017]. Table 3 indicates that DGA still shows the best performance.

Table 3: Comparison of various attribution methods with LeRF and MoRF on three models.

|                                |              | DLIFT | LRP   | SG    | RISE  | GCAM  | DGA          |
|--------------------------------|--------------|-------|-------|-------|-------|-------|--------------|
| LeRF ( $\uparrow$ is better)   | VGG-16       | 0.095 | 0.240 | 0.360 | 0.393 | 0.414 | <b>0.434</b> |
|                                | ResNet-18    | 0.143 | 0.348 | 0.375 | 0.410 | 0.429 | <b>0.533</b> |
|                                | Inception-V3 | 0.159 | -     | 0.548 | 0.500 | 0.554 | <b>0.691</b> |
| MoRF ( $\downarrow$ is better) | VGG-16       | 0.027 | 0.045 | 0.064 | 0.130 | 0.111 | <b>0.023</b> |
|                                | ResNet-18    | 0.041 | 0.062 | 0.078 | 0.115 | 0.115 | <b>0.019</b> |
|                                | Inception-V3 | 0.109 | -     | 0.114 | 0.144 | 0.123 | <b>0.041</b> |

## 31 J Training setup of the simple model for analysis

32 For the simple analysis in the Section 3.1, we train a simple neural network with 2-dimensional  
 33 half-moon shaped synthetic dataset. We train the simple neural network with fully-connected layers.  
 34 The number of nodes in the hidden layers are 5-3-1 repectively and ReLU activation function is used  
 35 for entire neurons without the output layer. The binary cross-entropy loss and Adam optimizer with  
 learning rate  $5e-4$  are used to train for 5000 epochs.

| Name              | Shape        | Activation |
|-------------------|--------------|------------|
| Input             | $N \times 2$ | -          |
| Fully Connected 1 | $N \times 5$ | ReLU       |
| Fully Connected 2 | $N \times 3$ | ReLU       |
| Fully Connected 3 | $N \times 1$ | -          |

36

## 37 K Hyperparameter exploration

38 DGA takes two hyperparameters: (1) the number of distillation steps  $N$ , and (2) the EPC threshold  
 39  $q$ . For the hyperparameter exploration, we use the pre-trained ResNet-18 and measure MoRF and  
 40 LeRF score for the randomly selected 1k images from the training dataset of ImageNet, which is  
 41 not included in the qualitative evalutaion in the main paper. At first, we analyze the relation between  
 42 the distillation steps  $N$  and EPC threshold  $q$ . We perform the grid search with the distillation steps  
 43  $N = [1, 10, 20, 30, 50, 100]$  and the EPC threshold  $q = [0.6, 0.7, 0.8, 0.9, 1.0]$ . We note that the  
 44 distillation step  $N = 1$  is equivalent to the local attribution for original input image and EPC threshold  
 45  $q = 1$  indicate the distillation with only WC mask. Figure 9 shows the relations between  $N$  and  $q$   
 46 with MoRF/LeRF score. The marker dots/lines indicate the specific distillation steps  $N$  and EPC  
 47 threshold  $q$ .

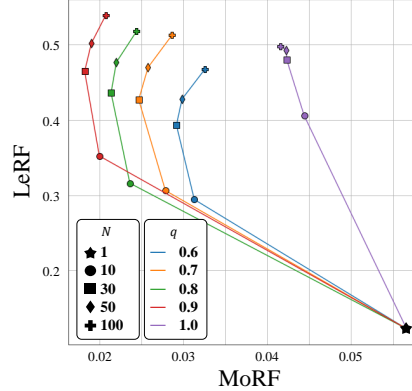

Figure 9: MoRF/LeRF score for various settings of the hyperparameters in ResNet-18.

48 From the left column in Figure 9, we observe that (1) the multiple steps (i.e.,  $N > 1$ ) always increase  
 49 the performance of MoRF/LeRF regardless of the EPC threshold  $q$ , and (2) the low EPC threshold  
 50  $q$  usually increase the performance of MoRF with degradation of the performance of LeRF. When  
 51 we consider the importance of the MoRF/LeRF performance with same weight, the best choices of  
 52 hyperparameters would be  $N = 30, 50$  and  $q = 0.9$ . Although the  $N = 50$  shows slightly better  
 53 performance than  $N = 30$ , we select  $N = 30$  for entire experiments in the main paper, because we  
 54 benefit from the computational cost, which is directly related to  $N$ .

## 55 References

- 56 Sebastian Bach, Alexander Binder, Grégoire Montavon, Frederick Klauschen, Klaus-Robert Müller,  
57 and Wojciech Samek. On pixel-wise explanations for non-linear classifier decisions by layer-wise  
58 relevance propagation. *PLoS ONE*, 10, 2015.
- 59 Vitali Petsiuk, Abir Das, and Kate Saenko. RISE: randomized input sampling for explanation of  
60 black-box models. In *British Machine Vision Conference*, 2018.
- 61 Ramprasaath R Selvaraju, Michael Cogswell, Abhishek Das, Ramakrishna Vedantam, Devi Parikh,  
62 and Dhruv Batra. Grad-cam: Visual explanations from deep networks via gradient-based localiza-  
63 tion. In *Proceedings of the IEEE International Conference on Computer Vision*, pages 618–626,  
64 2017.
- 65 Avanti Shrikumar, Peyton Greenside, and Anshul Kundaje. Learning important features through  
66 propagating activation differences. In *International Conference on Machine Learning*, pages  
67 3145–3153, 2017.
- 68 Daniel Smilkov, Nikhil Thorat, Been Kim, Fernanda Viégas, and Martin Wattenberg. Smoothgrad:  
69 removing noise by adding noise. *arXiv preprint arXiv:1706.03825*, 2017.
